# Supplementary material for: Measuring Dynamic Changes in the Spatial Pattern and Connectivity of Surface Waters Based on Landscape and Graph Metrics: A Case Study of Henan Province in Central China
Source: MDPI journal article supplement (doi:10.3390/land10050471), 2021-05-01
Supplement: s1 [file s1]

**Supplemental Table 1**

Conversion matrix of land use in different time periods from 1990 to 2018.

| Base year                                            |                | Land use area in 2000 (Compared year) (km <sup>2</sup> ) |             |                  |               |               |             |               |            |           |
|------------------------------------------------------|----------------|----------------------------------------------------------|-------------|------------------|---------------|---------------|-------------|---------------|------------|-----------|
| Compared year                                        |                | Crop land                                                | Forest land | Grass land       | Linear waters | Patchy waters | Tidal flats | Built-up land | Other land | Total     |
| Land use area in 1990 (Base year) (km <sup>2</sup> ) | Crop land      | 104438.52                                                | 33.21       | 15.62            | 35.08         | 103.19        | 53.40       | 1017.16       | 0.68       | 105696.87 |
|                                                      | Forest land    | 287.45                                                   | 26552.42    | 112.47           | 2.73          | 3.33          | 0.52        | 21.31         | 0.34       | 26980.58  |
|                                                      | Grass land     | 493.51                                                   | 443.88      | 8820.01          | 5.22          | 12.31         | 2.43        | 30.10         | 0.34       | 9807.81   |
|                                                      | Linear waters  | 191.36                                                   | 4.34        | 6.18             | 1686.94       | 5.06          | 57.03       | 2.61          | 6.47       | 1959.99   |
|                                                      | Patchy waters  | 101.18                                                   | 1.19        | 5.24             | 1.18          | 1142.90       | 104.00      | 4.59          | 0.00       | 1360.29   |
|                                                      | Tidal flats    | 270.76                                                   | 9.69        | 20.65            | 162.94        | 67.27         | 342.96      | 6.85          | 15.69      | 896.81    |
|                                                      | Built-up land  | 18.08                                                    | 0.00        | 0.34             | 0.19          | 0.10          | 0.00        | 18468.26      | 0.00       | 18486.97  |
|                                                      | Other land     | 92.91                                                    | 3.10        | 3.80             | 1.17          | 8.51          | 0.01        | 4.49          | 28.75      | 142.72    |
| Total                                                |                | 105893.77                                                | 27047.85    | 8984.31          | 1895.45↓      | 1342.67↓      | 560.35↓     | 19555.36      | 52.27      | 165332.03 |
| Based year                                           |                | Land use area in 2010 (Compared year) (km <sup>2</sup> ) |             |                  |               |               |             |               |            |           |
| Compared year                                        |                | Crop land                                                | Forest land | Grass land       | Linear waters | Patchy waters | Tidal flats | Built-up land | Other land | Total     |
| Land use area in 2000 (Base year) (km <sup>2</sup> ) | Crop land      | 104593.85                                                | 29.93       | 8.33             | 105.78        | 213.75        | 101.96      | 840.09        | 0.01       | 105893.69 |
|                                                      | Forest land    | 35.73                                                    | 26970.48    | 0.11             | 4.06          | 18.68         | 2.79        | 15.85         | 0.14       | 27047.85  |
|                                                      | Grass land     | 8.60                                                     | 1.80        | 8924.02          | 11.05         | 23.55         | 9.36        | 5.90          | 0.04       | 8984.31   |
|                                                      | Linear waters  | 26.49                                                    | 0.05        | 0.09             | 1812.87       | 13.98         | 41.79       | 0.11          | 0.00       | 1895.37   |
|                                                      | Patchy waters  | 13.39                                                    | 5.98        | 0.09             | 3.44          | 1300.11       | 9.62        | 9.97          | 0.00       | 1342.61   |
|                                                      | Tidal flats    | 70.44                                                    | 5.66        | 2.41             | 49.66         | 108.58        | 322.64      | 0.88          | 0.00       | 560.28    |
|                                                      | Built-up land  | 15.88                                                    | 0.00        | 0.01             | 1.23          | 1.33          | 0.00        | 19536.91      | 0.00       | 19555.36  |
|                                                      | Other land     | 16.71                                                    | 0.75        |                  | 8.27          | 1.17          | 4.03        | 0.14          | 21.19      | 52.27     |
| Total                                                |                | 104781.09                                                | 27014.65    | 8935.06          | 1996.37↑      | 1681.15↑      | 492.20↓     | 20409.85      | 21.37      | 165331.74 |
| Based year                                           |                | Land use area in 2018 (Compared year) (km <sup>2</sup> ) |             |                  |               |               |             |               |            |           |
| Compared year                                        |                | Crop land                                                | Forest land | Grass land       | Linear waters | Patchy waters | Tidal flats | Built-up land | Other land | Total     |
| Land use area in 2010 (Base year) (km <sup>2</sup> ) | Crop land      | 102078.76                                                | 439.02      | 144.72           | 87.79         | 118.46        | 22.57       | 1851.99       | 2.62       | 104745.92 |
|                                                      | Forest land    | 550.73                                                   | 26210.28    | 179.52           | 6.21          | 10.34         | 3.04        | 36.03         | 0.20       | 26996.35  |
|                                                      | Grass land     | 130.39                                                   | 296.48      | 8473.95          | 2.84          | 6.71          | 1.04        | 18.48         | 0.28       | 8930.17   |
|                                                      | Linear waters  | 88.94                                                    | 37.38       | 13.27            | 1699.69       | 53.09         | 69.14       | 5.76          | 5.12       | 1972.40   |
|                                                      | Patchy waters  | 31.52                                                    | 9.27        | 3.64             | 10.80         | 1610.96       | 5.91        | 7.52          | 0.04       | 1679.67   |
|                                                      | Tidal flats    | 110.25                                                   | 1.32        | 9.88             | 36.23         | 30.39         | 285.94      | 2.58          | 10.33      | 486.93    |
|                                                      | Built-up land  | 581.98                                                   | 19.32       | 15.56            | 5.33          | 5.07          | 0.43        | 19780.96      | 0.03       | 20408.68  |
|                                                      | Other land     | 1.03                                                     | 7.80        | 0.47             | 0.01          | 0.00          | 0.00        | 0.78          | 11.27      | 21.37     |
| Total                                                |                | 103573.58                                                | 27020.87    | 8841.02          | 1848.91↓      | 1835.02↑      | 388.07↓     | 21704.10      | 29.90      | 165241.48 |
| note:                                                | changed waters | great changed waters                                     |             | unchanged waters |               |               |             |               |            |           |

**Supplemental Table 2**

Correlation analysis between socioeconomic factors, precipitation, water area, landscape metrics, and graph metrics in the Henan Province region. (x1: total population, x2: per-capita GDP, x3: urbanization rate, x4: rainfall, x5: patchy-water area, x6: linear-water area, x7: tidal-flat area, x8: total surface water area, x9-x26: PD, LPI, CONTIG\_AM, ENN\_MN, COHESION and MESH of linear waters, patchy waters and tidal flats at the class level, respectively, x27-x32: PD, LPI, CONTIG\_AM, ENN\_MN, COHESION and MESH at the landscape level, respectively, x33-36: IIC, NC, SLC and EC at the global level, respectively).

|                             |     | X1             | X2           | X3           | X4            | X5            | X6     | X7            | X8     | X9             | X10           | X11           | X12            |
|-----------------------------|-----|----------------|--------------|--------------|---------------|---------------|--------|---------------|--------|----------------|---------------|---------------|----------------|
| Total population            | X1  | 1              |              |              |               |               |        |               |        |                |               |               |                |
| Per-capita GDP              | X2  | 0.652          | 1            |              |               |               |        |               |        |                |               |               |                |
| Urbanization rate           | X3  | 0.738          | <b>.989*</b> | 1            |               |               |        |               |        |                |               |               |                |
| Rainfall                    | X4  | 0.071          | -0.517       | -0.503       | 1             |               |        |               |        |                |               |               |                |
| Patchy-water area           | X5  | 0.588          | <b>.958*</b> | <b>.966*</b> | -0.71         | 1             |        |               |        |                |               |               |                |
| Linear-water area           | X6  | -0.512         | -0.49        | -0.444       | -0.438        | -0.221        | 1      |               |        |                |               |               |                |
| Tidal-flat area             | X7  | <b>-.971*</b>  | -0.784       | -0.861       | 0.166         | -0.759        | 0.428  | 1             |        |                |               |               |                |
| Total surface water area    | X8  | -0.57          | 0.133        | 0.067        | -0.856        | 0.306         | 0.556  | 0.358         | 1      |                |               |               |                |
| PD of linear waters         | X9  | -0.779         | -0.843       | -0.909       | 0.569         | -0.919        | 0.119  | 0.903         | -0.065 | 1              |               |               |                |
| PD of patchy waters         | X10 | -0.442         | -0.874       | -0.883       | 0.846         | <b>-.975*</b> | 0.007  | 0.643         | -0.482 | 0.889          | 1             |               |                |
| PD of tidal flats           | X11 | -0.874         | -0.754       | -0.843       | 0.399         | -0.817        | 0.145  | <b>.952*</b>  | 0.133  | <b>.975*</b>   | 0.766         | 1             |                |
| LPI of linear waters        | X12 | <b>1.000**</b> | 0.656        | 0.743        | 0.049         | 0.6           | -0.49  | <b>-.976*</b> | -0.553 | -0.793         | -0.459        | -0.886        | 1              |
| LPI of patchy waters        | X13 | 0.325          | 0.922        | 0.856        | -0.589        | 0.865         | -0.466 | -0.485        | 0.377  | -0.611         | -0.810        | -0.458        | 0.326          |
| LPI of tidal flats          | X14 | <b>-.975*</b>  | -0.632       | -0.735       | 0.076         | -0.633        | 0.312  | <b>.975*</b>  | 0.451  | 0.856          | 0.529         | 0.945         | <b>-.980*</b>  |
| IJI of linear waters        | X15 | 0.785          | 0.492        | 0.615        | -0.335        | 0.616         | 0.12   | -0.839        | -0.167 | -0.875         | -0.608        | -0.94         | 0.802          |
| IJI of patchy waters        | X16 | -0.177         | 0.499        | 0.461        | <b>-.986*</b> | 0.668         | 0.388  | -0.062        | 0.909  | -0.469         | -0.802        | -0.277        | -0.157         |
| IJI of tidal flats          | X17 | 0.867          | 0.21         | 0.34         | 0.297         | 0.202         | -0.205 | -0.771        | -0.724 | -0.543         | -0.098        | -0.715        | 0.868          |
| ENN of linear waters        | X18 | 0.7            | 0.852        | 0.908        | -0.663        | 0.945         | -0.06  | -0.847        | 0.184  | <b>-.993**</b> | -0.935        | -0.944        | 0.715          |
| ENN of patchy waters        | X19 | 0.625          | 0.948        | <b>.966*</b> | -0.697        | <b>.998**</b> | -0.203 | -0.790        | 0.272  | <b>-.943</b>   | <b>-.972*</b> | -0.853        | 0.637          |
| ENN of tidal flats          | X20 | 0.675          | 0.711        | 0.793        | -0.647        | 0.85          | 0.12   | -0.811        | 0.165  | <b>-.971*</b>  | -0.868        | -0.949        | 0.694          |
| COHESION of linear waters   | X21 | 0.902          | 0.814        | 0.892        | -0.364        | 0.844         | -0.264 | <b>-.977*</b> | -0.166 | <b>-.973*</b>  | -0.771        | <b>-.992*</b> | 0.912          |
| COHESION of patchy waters   | X22 | 0.251          | 0.849        | 0.82         | -0.883        | 0.93          | -0.028 | -0.468        | 0.625  | -0.748         | <b>-.967*</b> | -0.583        | 0.265          |
| COHESION of tidal flats     | X23 | <b>-.974*</b>  | -0.805       | -0.866       | 0.077         | -0.734        | 0.569  | <b>.987*</b>  | 0.421  | 0.845          | 0.59          | 0.893         | <b>-.974*</b>  |
| MESH of linear waters       | X24 | 0.844          | 0.836        | 0.908        | -0.475        | 0.89          | -0.191 | -0.945        | -0.045 | <b>-.994**</b> | -0.838        | <b>-.990*</b> | 0.856          |
| MESH of patchy waters       | X25 | 0.432          | <b>.965*</b> | 0.918        | -0.611        | 0.924         | -0.443 | -0.592        | 0.333  | -0.716         | -0.868        | -0.578        | 0.435          |
| MESH of tidal flats         | X26 | <b>-.986*</b>  | -0.623       | -0.724       | 0.019         | -0.606        | 0.363  | <b>.974*</b>  | 0.501  | 0.829          | 0.49          | 0.924         | <b>-.990**</b> |
| PD at landscape level       | X27 | -0.69          | -0.871       | -0.921       | 0.672         | <b>-.958*</b> | 0.081  | 0.842         | -0.200 | <b>.990*</b>   | 0.945         | 0.934         | -0.706         |
| LPI at landscape level      | X28 | 0.325          | 0.922        | 0.856        | -0.589        | 0.865         | -0.466 | -0.485        | 0.377  | -0.611         | -0.81         | -0.458        | 0.326          |
| IJI at landscape level      | X29 | 0.876          | 0.444        | 0.573        | -0.113        | 0.515         | -0.037 | -0.877        | -0.393 | -0.809         | -0.463        | -0.915        | 0.887          |
| ENN_MN at landscape level   | X30 | 0.706          | 0.902        | 0.946        | -0.65         | <b>.970*</b>  | -0.146 | -0.854        | 0.179  | <b>-.987*</b>  | -0.946        | -0.928        | 0.72           |
| COHESION at landscape level | X31 | 0.707          | 0.917        | <b>.957*</b> | -0.644        | <b>.977*</b>  | -0.176 | -0.855        | 0.177  | <b>-.982*</b>  | -0.947        | -0.92         | 0.72           |
| MESH at landscape level     | X32 | 0.519          | <b>.984*</b> | <b>.959*</b> | -0.644        | <b>.971*</b>  | -0.382 | -0.683        | 0.305  | -0.813         | -0.92         | -0.69         | 0.526          |
| IIC at global level         | X33 | -0.767         | -0.403       | -0.425       | -0.569        | -0.175        | 0.89   | 0.636         | 0.826  | 0.261          | -0.046        | 0.373         | -0.748         |
| NC at global level          | X34 | 0.521          | 0.745        | 0.684        | 0.083         | 0.523         | -0.932 | -0.524        | -0.262 | -0.346         | -0.341        | -0.304        | 0.505          |
| SLC at global level         | X35 | -0.805         | -0.897       | -0.893       | 0.085         | -0.75         | 0.792  | 0.835         | 0.293  | 0.695          | 0.583         | 0.681         | -0.798         |
| EC at global level          | X36 | -0.768         | -0.359       | -0.388       | -0.601        | -0.136        | 0.866  | 0.628         | 0.857  | 0.243          | -0.084        | 0.366         | -0.750         |

## Continued

|                             |     | X13            | X14           | X15          | X16    | X17    | X18            | X19           | X20           | X21           | X22    | X23          | X24           |
|-----------------------------|-----|----------------|---------------|--------------|--------|--------|----------------|---------------|---------------|---------------|--------|--------------|---------------|
| LPI of patchy waters        | X13 | 1              |               |              |        |        |                |               |               |               |        |              |               |
| LPI of tidal flats          | X14 | -0.284         | 1             |              |        |        |                |               |               |               |        |              |               |
| IJI of linear waters        | X15 | 0.151          | -0.904        | 1            |        |        |                |               |               |               |        |              |               |
| IJI of patchy waters        | X16 | 0.632          | 0.052         | 0.183        | 1      |        |                |               |               |               |        |              |               |
| IJI of tidal flats          | X17 | -0.180         | -0.885        | 0.798        | -0.439 | 1      |                |               |               |               |        |              |               |
| ENN_MN of linear waters     | X18 | 0.655          | -0.788        | 0.836        | 0.572  | 0.444  | 1              |               |               |               |        |              |               |
| ENN_MN of patchy waters     | X19 | 0.832          | -0.676        | 0.667        | 0.645  | 0.261  | <b>.964*</b>   | 1             |               |               |        |              |               |
| ENN_MN of tidal flats       | X20 | 0.472          | -0.800        | 0.920        | 0.530  | 0.527  | <b>.973*</b>   | 0.881         | 1             |               |        |              |               |
| COHESION of linear waters   | X21 | 0.533          | -0.948        | 0.893        | 0.255  | 0.695  | 0.939          | 0.875         | 0.916         | 1             |        |              |               |
| COHESION of patchy waters   | X22 | 0.886          | -0.317        | 0.385        | 0.881  | -0.149 | 0.816          | 0.911         | 0.714         | 0.603         | 1      |              |               |
| COHESION of tidal flats     | X23 | -0.529         | 0.942         | -0.741       | 0.008  | -0.735 | -0.784         | -0.759        | -0.718        | -0.937        | -0.436 | 1            |               |
| MESH of linear waters       | X24 | 0.579          | -0.906        | 0.889        | 0.370  | 0.619  | <b>.973*</b>   | 0.917         | <b>.951*</b>  | <b>.993**</b> | 0.684  | -0.895       | 1             |
| MESH of patchy waters       | X25 | <b>.990**</b>  | -0.407        | 0.288        | 0.631  | -0.056 | 0.752          | 0.899         | 0.585         | 0.645         | 0.909  | -0.623       | 0.688         |
| MESH of tidal flats         | X26 | -0.275         | <b>.998**</b> | -0.876       | 0.105  | -0.895 | -0.756         | -0.649        | -0.761        | -0.933        | -0.279 | <b>.950*</b> | -0.885        |
| PD at landscape level       | X27 | -0.686         | 0.774         | -0.814       | -0.587 | -0.417 | <b>-.999**</b> | <b>-.974*</b> | <b>-.964*</b> | -0.933        | -0.835 | 0.783        | <b>-.969*</b> |
| LPI at landscape level      | X28 | <b>1.000**</b> | -0.284        | 0.151        | 0.632  | -0.18  | 0.655          | 0.832         | 0.472         | 0.533         | 0.886  | -0.529       | 0.579         |
| IJI at landscape level      | X29 | 0.069          | <b>-.956*</b> | <b>.972*</b> | -0.04  | 0.915  | 0.745          | 0.57          | 0.823         | 0.881         | 0.222  | -0.803       | 0.848         |
| ENN_MN at landscape level   | X30 | 0.724          | -0.776        | 0.788        | 0.572  | 0.407  | <b>.995**</b>  | <b>.984*</b>  | <b>0.945</b>  | 0.936         | 0.842  | -0.806       | <b>.969*</b>  |
| COHESION at landscape level | X31 | 0.747          | -0.769        | 0.769        | 0.57   | 0.394  | <b>.990**</b>  | <b>.989*</b>  | 0.932         | 0.933         | 0.849  | -0.812       | <b>.965*</b>  |
| MESH at landscape level     | X32 | <b>.958*</b>   | -0.518        | 0.429        | 0.639  | 0.063  | 0.843          | <b>.955*</b>  | 0.701         | 0.744         | 0.925  | -0.694       | 0.786         |
| IIC at global level         | X33 | -0.208         | 0.607         | -0.216       | 0.59   | -0.618 | -0.163         | -0.188        | -0.065        | -0.458        | 0.141  | 0.737        | -0.358        |
| NC at global level          | X34 | 0.755          | -0.356        | -0.017       | -0.029 | 0.088  | 0.319          | 0.496         | 0.112         | 0.422         | 0.385  | -0.646       | 0.386         |
| SLC at global level         | X35 | -0.764         | 0.708         | -0.412       | -0.069 | -0.411 | -0.657         | -0.747        | -0.502        | -0.768        | -0.531 | 0.903        | -0.736        |
| EC at global level          | X36 | -0.152         | 0.612         | -0.228       | 0.629  | -0.649 | -0.141         | -0.152        | -0.055        | -0.446        | 0.187  | 0.724        | -0.343        |

## Continued

|                             |     | X25           | X26    | X27            | X28          | X29    | X30           | X31    | X32    | X33           | X34    | X35   | X36 |
|-----------------------------|-----|---------------|--------|----------------|--------------|--------|---------------|--------|--------|---------------|--------|-------|-----|
| MESH of patchy waters       |     | X25           | 1      |                |              |        |               |        |        |               |        |       |     |
| MESH of tidal flats         | X25 | 1             |        |                |              |        |               |        |        |               |        |       |     |
| PD at landscape level       | X26 | -0.395        | 1      |                |              |        |               |        |        |               |        |       |     |
| LPI at landscape level      | X27 | -0.778        | 0.742  | 1              |              |        |               |        |        |               |        |       |     |
| IJI at landscape level      | X28 | <b>.990**</b> | -0.275 | -0.686         | 1            |        |               |        |        |               |        |       |     |
| ENN_MN at landscape level   | X29 | 0.207         | -0.942 | -0.721         | 0.069        | 1      |               |        |        |               |        |       |     |
| COHESION at landscape level | X30 | 0.812         | -0.747 | <b>-.998**</b> | 0.724        | 0.702  | 1             |        |        |               |        |       |     |
| MESH at landscape level     | X31 | 0.832         | -0.742 | <b>-.994**</b> | 0.747        | 0.686  | <b>.999**</b> | 1      |        |               |        |       |     |
| IIC at global level         | X32 | <b>.988*</b>  | -0.501 | -0.864         | <b>.958*</b> | 0.344  | 0.891         | 0.906  | 1      |               |        |       |     |
| NC at global level          | X33 | -0.242        | 0.657  | 0.166          | -0.208       | -0.409 | -0.213        | -0.231 | -0.244 | 1             |        |       |     |
| SLC at global level         | X34 | 0.735         | -0.391 | -0.347         | 0.755        | 0.065  | 0.411         | 0.443  | 0.678  | -0.749        | 1      |       |     |
| EC at global level          | X35 | -0.804        | 0.726  | 0.673          | -0.764       | -0.471 | -0.719        | -0.74  | -0.812 | 0.764         | -0.904 | 1     |     |
| MESH of patchy waters       | X36 | -0.189        | 0.662  | 0.142          | -0.152       | -0.427 | -0.186        | -0.203 | -0.196 | <b>.998**</b> | -0.708 | 0.731 | 1   |

Note: \*\* Extremely significant correlation

\* Significant correlation
